# Supplementary material for: Liposomal Forms of Fluoroquinolones and Antifibrotics Decorated with Mannosylated Chitosan for Inhalation Drug Delivery
Source: MDPI journal article supplement (doi:10.3390/pharmaceutics15041101), 2023-03-29
Supplement: s1 [file s1]

## Supplementary materials for the manuscript

### “Liposomal Forms of Fluoroquinolones and Antifibrotics Decorated with Mannosylated Chitosan for Inhalation Drug Delivery”

**Table S1.** Values of  $R^2$  for release kinetics approximations in different linearization models.

| Sample                 | 0 order | 1 order | Hixon-Crowell | Higuchi |
|------------------------|---------|---------|---------------|---------|
| LMox                   | 0,971   | 0,938   | 0,952         | 0,803   |
| LMox + Polymer         | 0,930   | 0,911   | 0,918         | 0,753   |
| LLev DPPC              | 0,940   | 0,924   | 0,910         | 0,749   |
| LLev DPPC + Polymer    | 0,969   | 0,960   | 0,964         | 0,838   |
| LLev DPPC:CL           | 0,940   | 0,884   | 0,901         | 0,736   |
| LLev DPPC:CL + Polymer | 0,977   | 0,970   | 0,973         | 0,833   |
| LPf                    | 0,946   | 0,974   | 0,967         | 0,984   |
| LPf + Polymer          | 0,996   | 0,994   | 0,995         | 0,890   |
| Mean value             | 0,958   | 0,944   | 0,947         | 0,823   |
| SD                     | 0,023   | 0,037   | 0,034         | 0,084   |

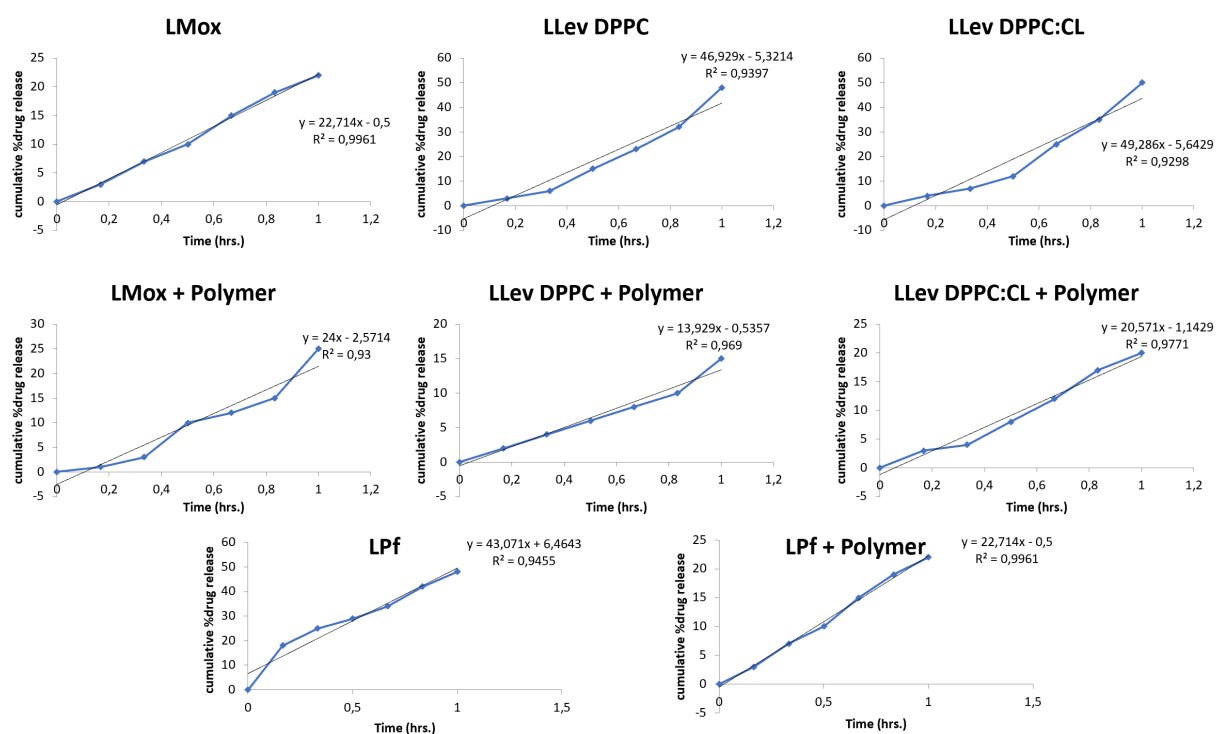

**Figure S1.** Linearization of release curves for liposomal forms of Mox, Lev and Pf. Liposomal formulations: LMox DPPC:CL 80:20, LLev DPPC, LLev DPPC:CL 80:20, LPf DPPC:CL 80:20 and its complexes with mannosylated chitosan, basemolar ratio 1:7. Total lipid concentration 3 mg/mL. 0,02 M Na-phosphate buffer solution, pH 7.4. 37 °C. SD (n=3),  $p < 0.05$ .
